# Supplementary material for: Supervised Myoelectrical Hand Gesture Recognition in Post-Acute Stroke Patients with Upper Limb Paresis on Affected and Non-Affected Sides
Source: MDPI journal article supplement (doi:10.3390/s22228733), 2022-11-11
Supplement: s1 [file s1]

Article

# Supervised Myoelectrical Hand Gesture Recognition in Post-Acute Stroke Patients with Upper Limb Paresis on Affected and Non-Affected Sides

Alexey Anastasiev <sup>1</sup>, Hideki Kadone <sup>2,\*</sup>, Aiki Marushima <sup>3</sup>, Hiroki Watanabe <sup>3</sup>, Alexander Zaboronok <sup>3</sup>, Shinya Watanabe <sup>3</sup>, Akira Matsumura <sup>4</sup>, Kenji Suzuki <sup>5</sup>, Yuji Matsumaru <sup>3</sup> and Eiichi Ishikawa <sup>3</sup>

<sup>1</sup> Department of Neurosurgery, Graduate School of Comprehensive Human Sciences, University of Tsukuba, 1-1-1 Tennodai, Tsukuba 305-8575, Ibaraki, Japan

<sup>2</sup> Center for Cybernics Research, Faculty of Medicine, University of Tsukuba, 1-1-1 Tennodai, Tsukuba 305-8573, Ibaraki, Japan

<sup>3</sup> Department of Neurosurgery, Faculty of Medicine, University of Tsukuba, 1-1-1 Tennodai, Tsukuba 305-8575, Ibaraki, Japan

<sup>4</sup> Ibaraki Prefectural University of Health Sciences, 4669-2 Amicho, Inashiki 300-0394, Ibaraki, Japan

<sup>5</sup> Center for Cybernics Research, Artificial Intelligence Laboratory, Faculty of Engineering Information and Systems, University of Tsukuba, 1-1-1 Tennodai, Tsukuba 305-8573, Ibaraki, Japan

\* Correspondence: kadone@ccr.tsukuba.ac.jp

## Supplementary Materials:

Affected and non-affected side feature vector contribution for NP19 and P19 datasets.

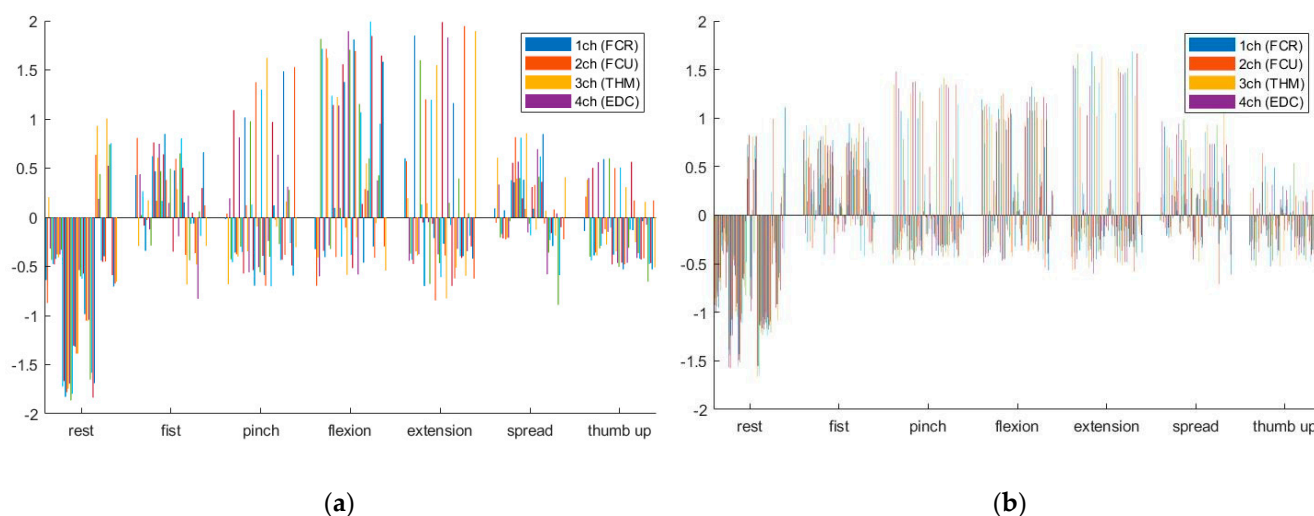

**Figure S1.** This is the vector feature-per-channel contribution for NP19 (a) and P19 (b) acute stroke data using ASF-14NP feature set for non-affected side, and ASF-24P for the affected side.

Confusion matrix charts of possible random gesture combinations in NP19 using SVM.

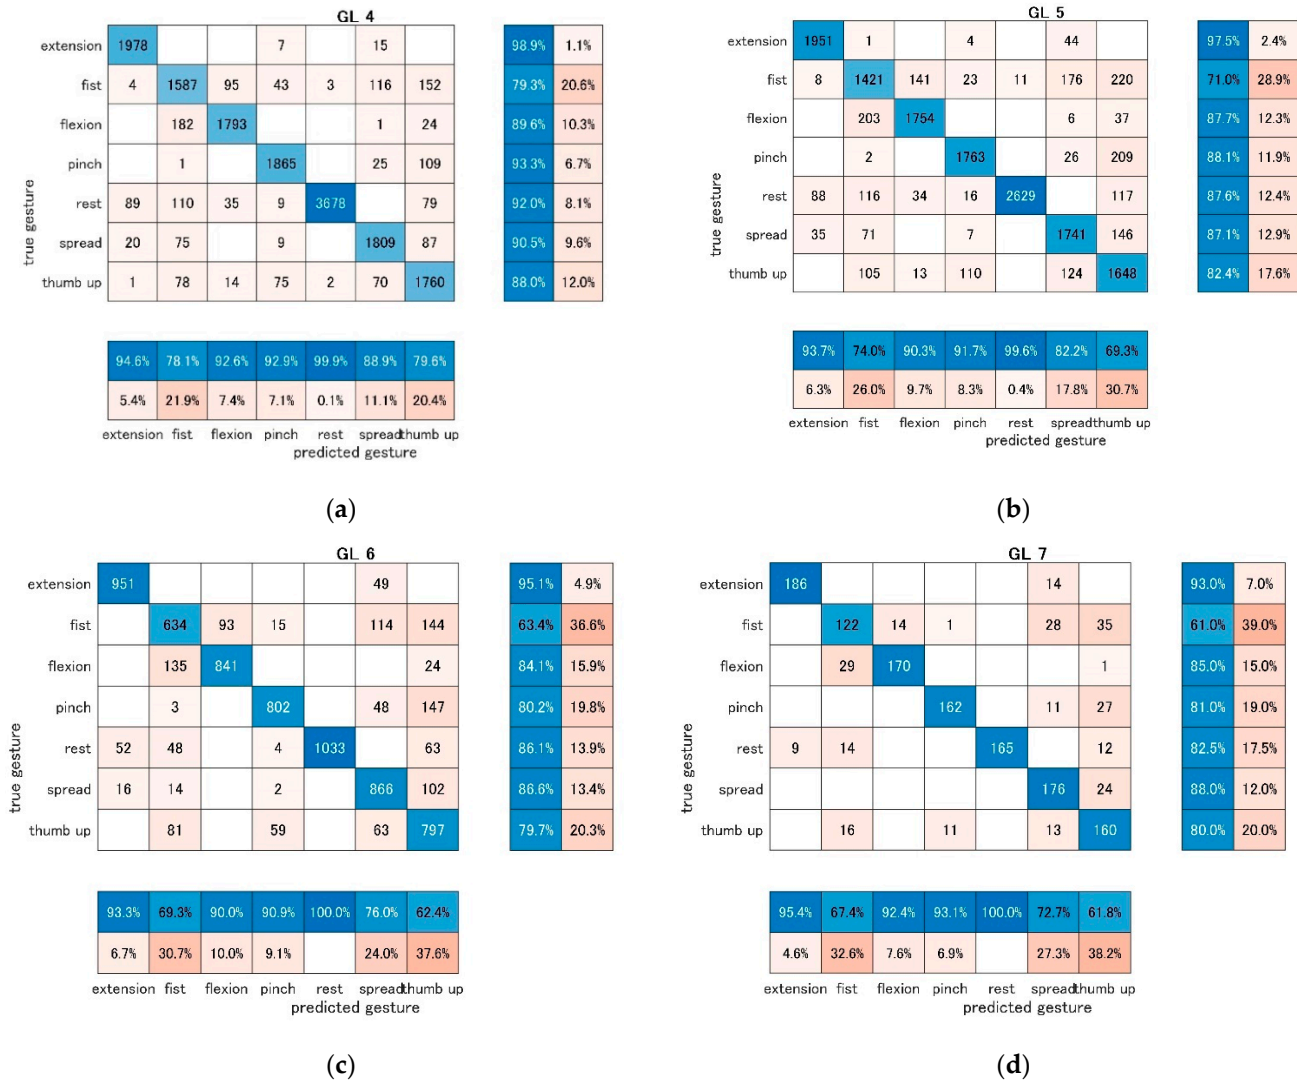

**Figure S2.** This is non-paretic cross-validation confusion matrix charts with predicted on x-axis and true gesture labels on y-axis which return accuracy rate value using SVM on the non-affected side: **(a)** all possible combinations (20) withing 4 gesture labels (GL4) with the total mean accuracy rate of 95.18%; **(b)** all possible combinations (15) withing 5 gesture labels (GL5) with the total mean accuracy rate of 94.41%; **(c)** all possible combinations (6) withing 6 gesture labels (GL6) with the total mean accuracy rate of 94.28%; **(d)** one possible combination withing 7 gesture labels (GL7) with the total mean accuracy rate of 94.73%. PCA has not been applied for ASF-14NP feature set.

Confusion matrix charts of possible random gesture combinations in NP19 using LDA.

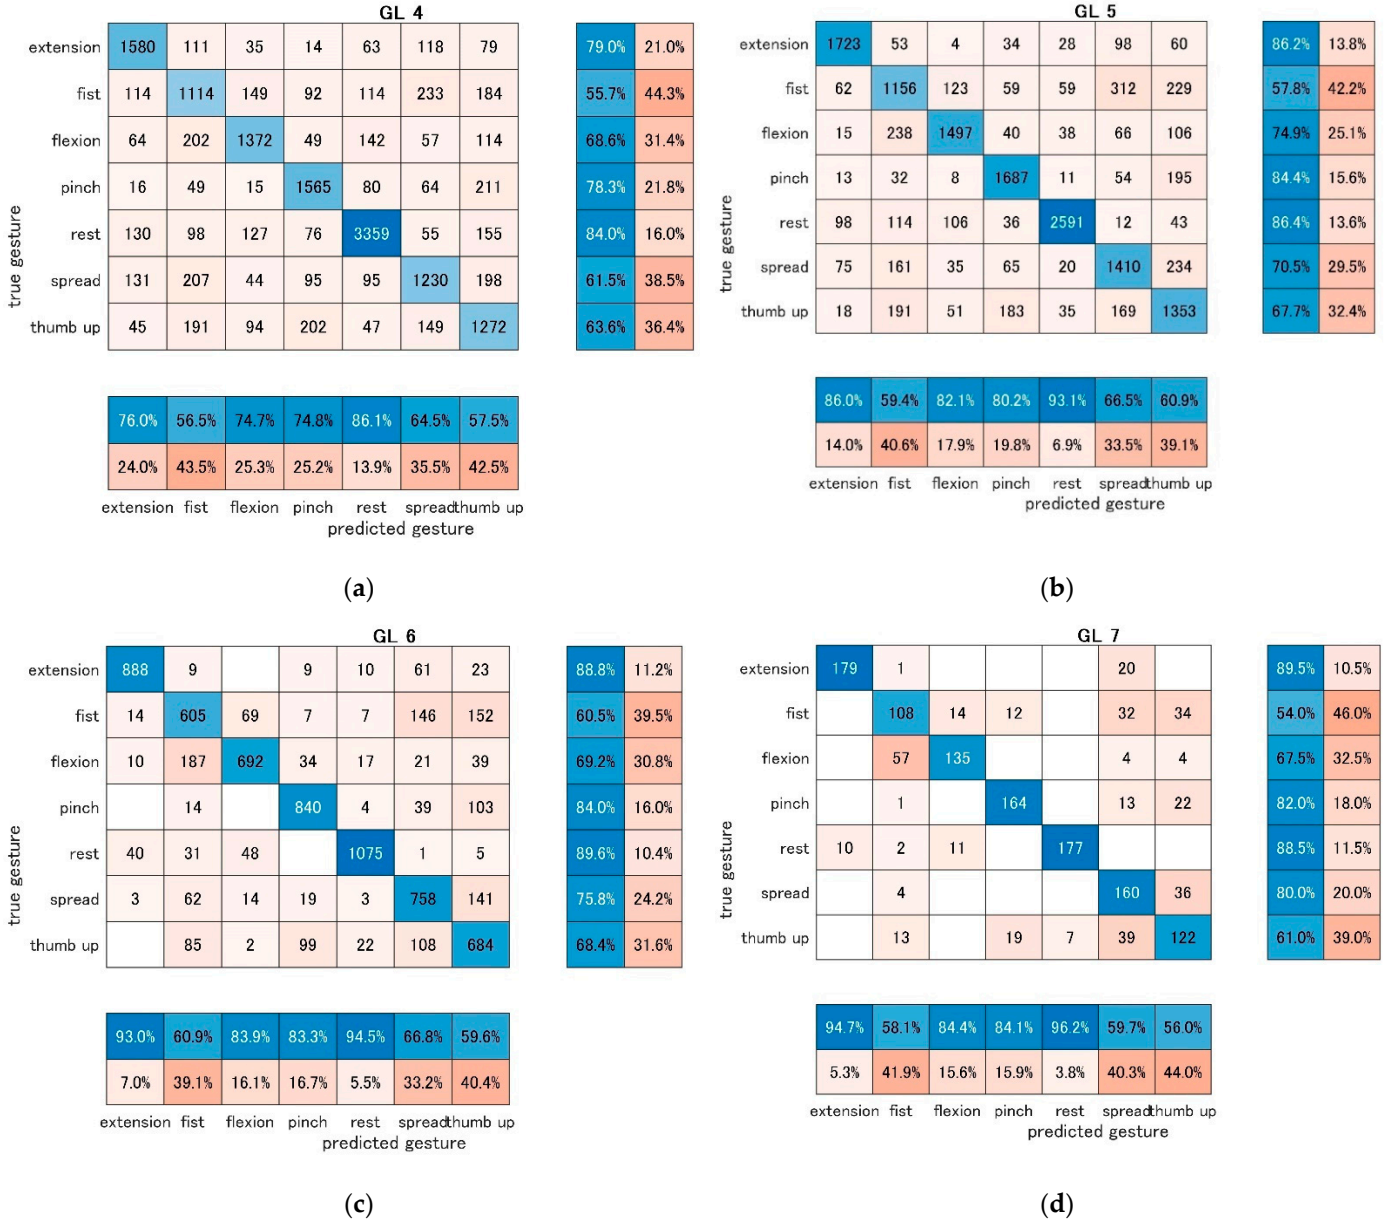

**Figure S3.** This is non-paretic cross-validation confusion matrix charts with predicted on x-axis and true gesture labels on y-axis which return accuracy rate value using LDA on the non-affected side: (a) all possible combinations (20) withing 4 gesture labels (GL4) with the total mean accuracy rate of 88.40%; (b) all possible combinations (15) withing 5 gesture labels (GL5) with the total mean accuracy rate of 91.30%; (c) all possible combinations (6) withing 6 gesture labels (GL6) with the total mean accuracy rate of 92.49%; (d) one possible combination withing 7 gesture labels (GL7) with the total mean accuracy rate of 93.27%. PCA has not been applied for ASF-14NP feature set.

Confusion matrix charts of possible random gesture combinations in NP19 using k-NN.

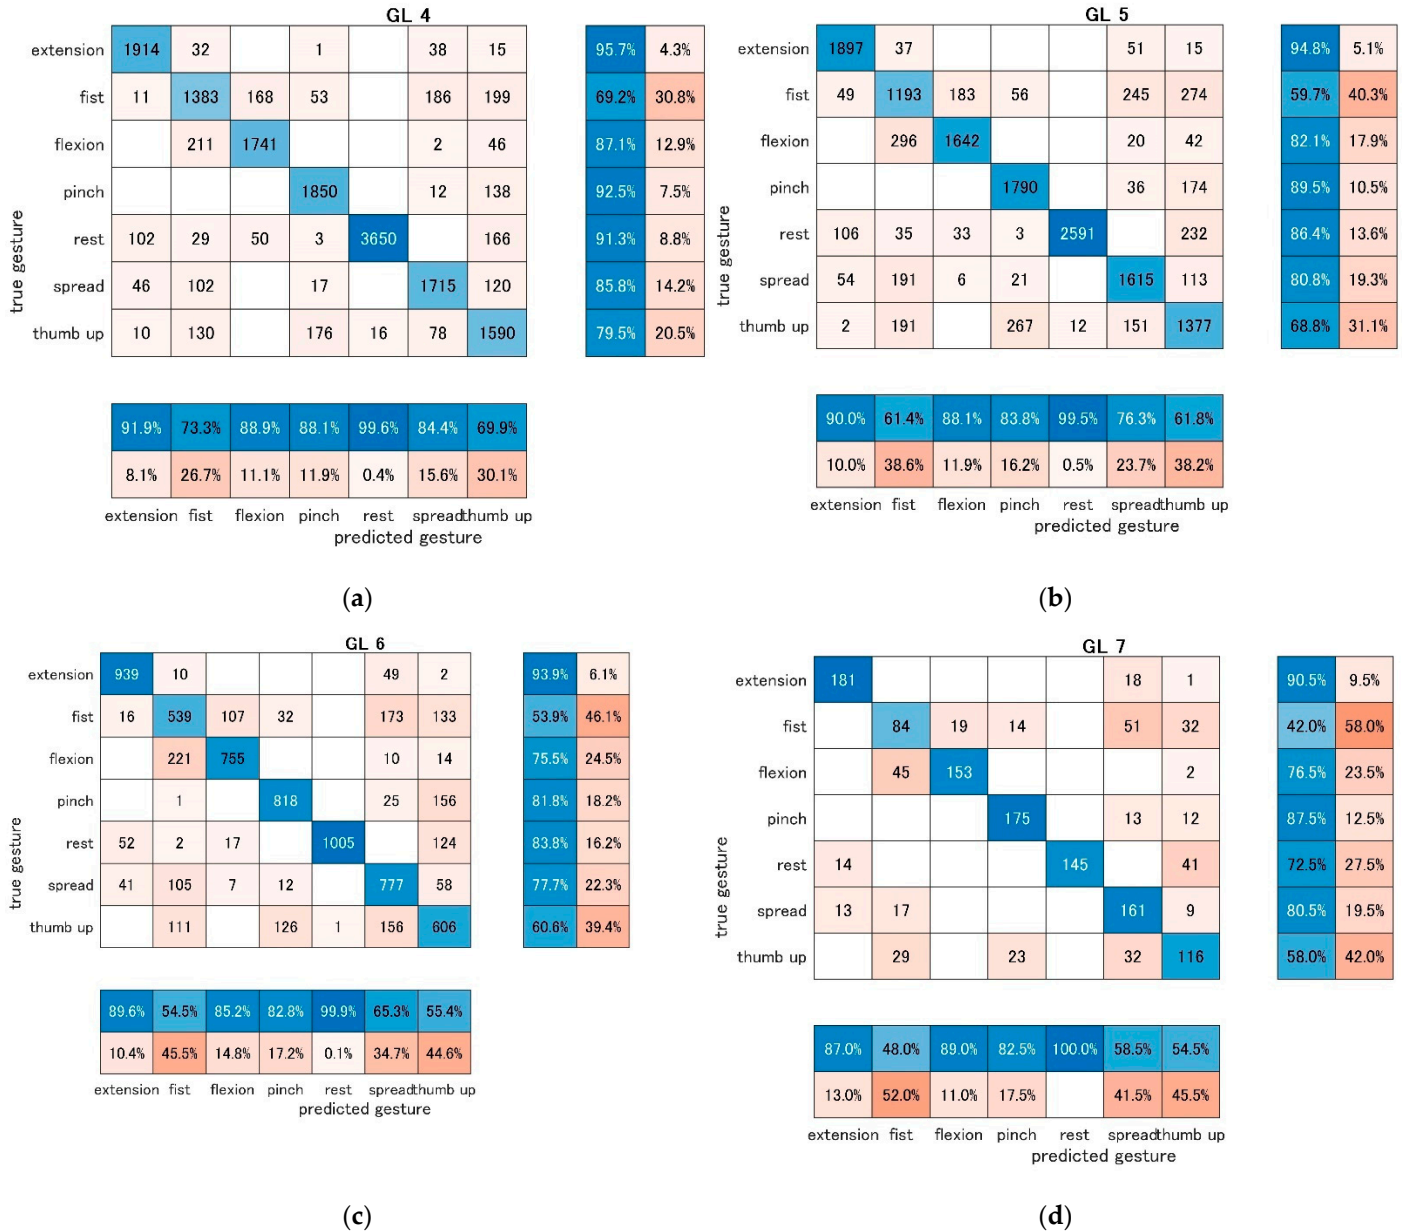

**Figure S4.** This is non-paretic cross-validation confusion matrix charts with predicted on x-axis and true gesture labels on y-axis which return accuracy rate value using k-NN on the non-affected side: **(a)** all possible combinations (20) with 4 gesture labels (GL4) with the total mean accuracy rate of 93.42%; **(b)** all possible combinations (15) with 5 gesture labels (GL5) with the total mean accuracy rate of 92.34%; **(c)** all possible combinations (6) with 6 gesture labels (GL6) with the total mean accuracy rate of 91.85%; **(d)** one possible combination with 7 gesture labels (GL7) with the total mean accuracy rate of 91.71%. PCA has not been applied for ASF-14NP feature set.

Confusion matrix charts of possible random gesture combinations in P19 using SVM.

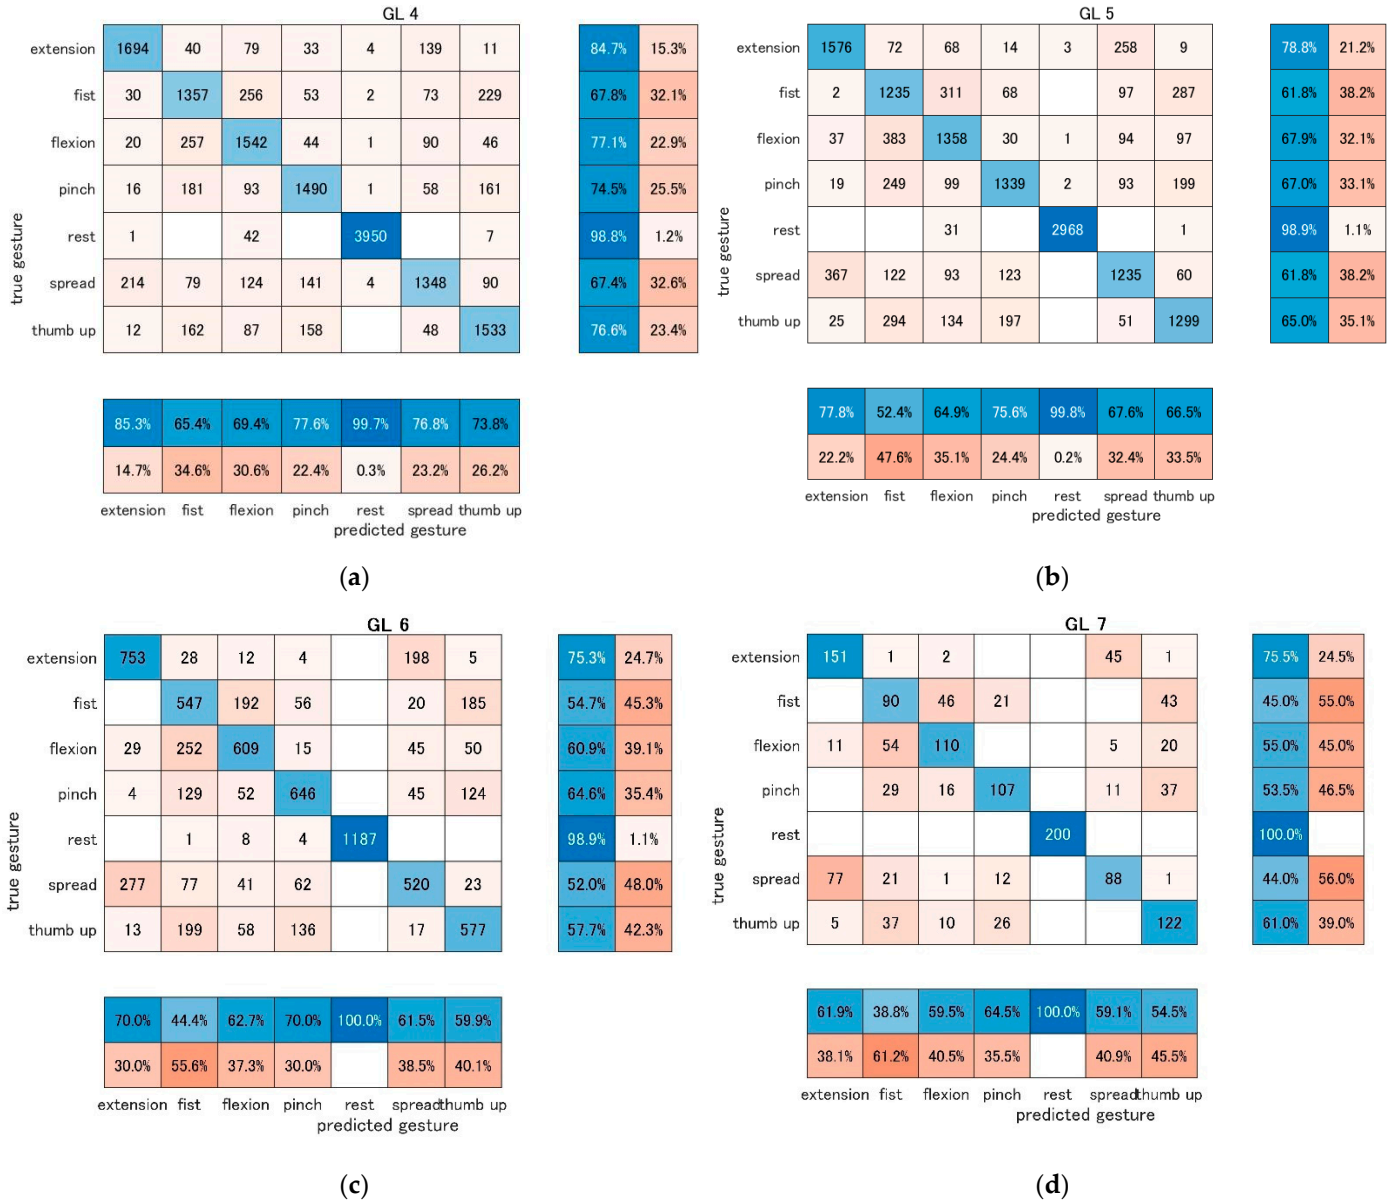

**Figure S5.** This is paritic cross-validation confusion matrix charts with predicted on x-axis and true gesture labels on y-axis which return accuracy rate value using SVM on the affected side: (a) all possible combinations (20) withing 4 gesture labels (GL4) with the total mean accuracy rate of 90.07%; (b) all possible combinations (15) withing 5 gesture labels (GL5) with the total mean accuracy rate of 89.24%; (c) all possible combinations (6) withing 6 gesture labels (GL6) with the total mean accuracy rate of 88.91%; (d) one possible combination withing 7 gesture labels (GL7) with the total mean accuracy rate of 89.75%. PCA has not been applied for ASF-24P feature set.



Confusion matrix charts of possible random gesture combinations in P19 using LDA.

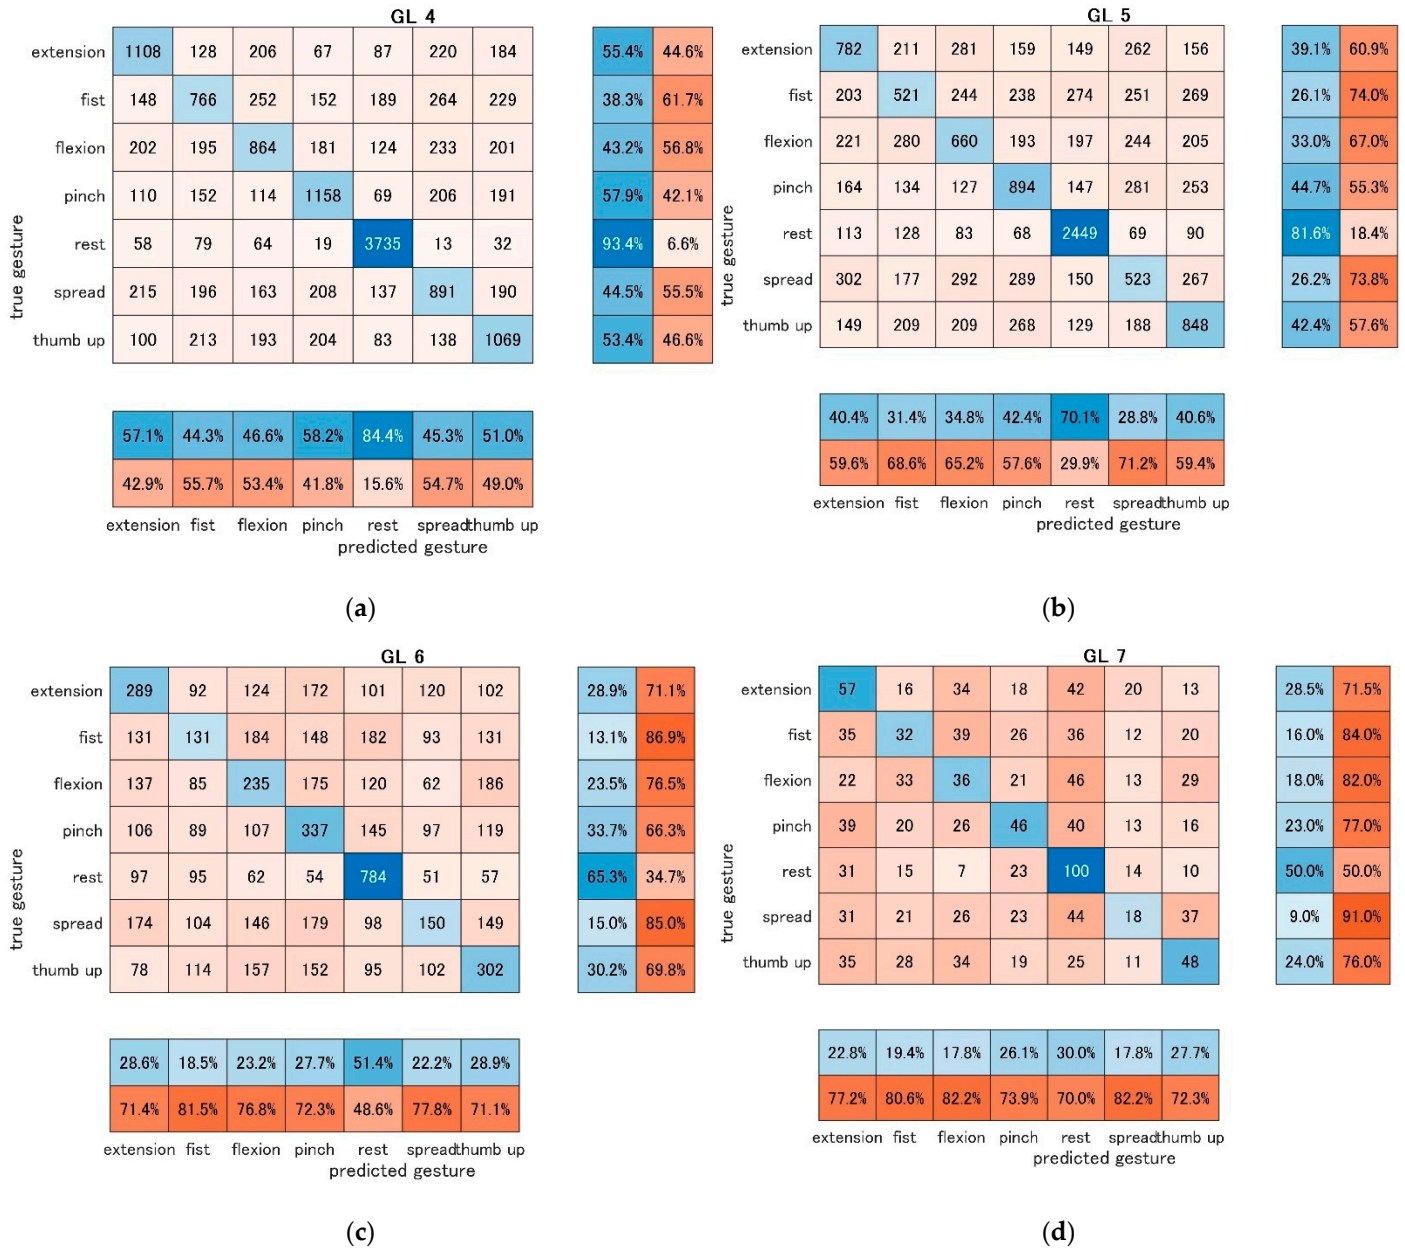

**Figure S6.** This is parietic cross-validation confusion matrix charts with predicted on x-axis and true gesture labels on y-axis which return accuracy rate value using LDA on the affected side: (a) all possible combinations (20) withing 4 gesture labels (GL4) with the total mean accuracy rate of 80.17%; (b) all possible combinations (15) withing 5 gesture labels (GL5) with the total mean accuracy rate of 77.89%; (c) all possible combinations (6) withing 6 gesture labels (GL6) with the total mean accuracy rate of 77.60%; (d) one possible combination withing 7 gesture labels (GL7) with the total mean accuracy rate of 77.42%. PCA has not been applied for ASF-24P feature set.

Confusion matrix charts of possible random gesture combinations in P19 using k-NN.

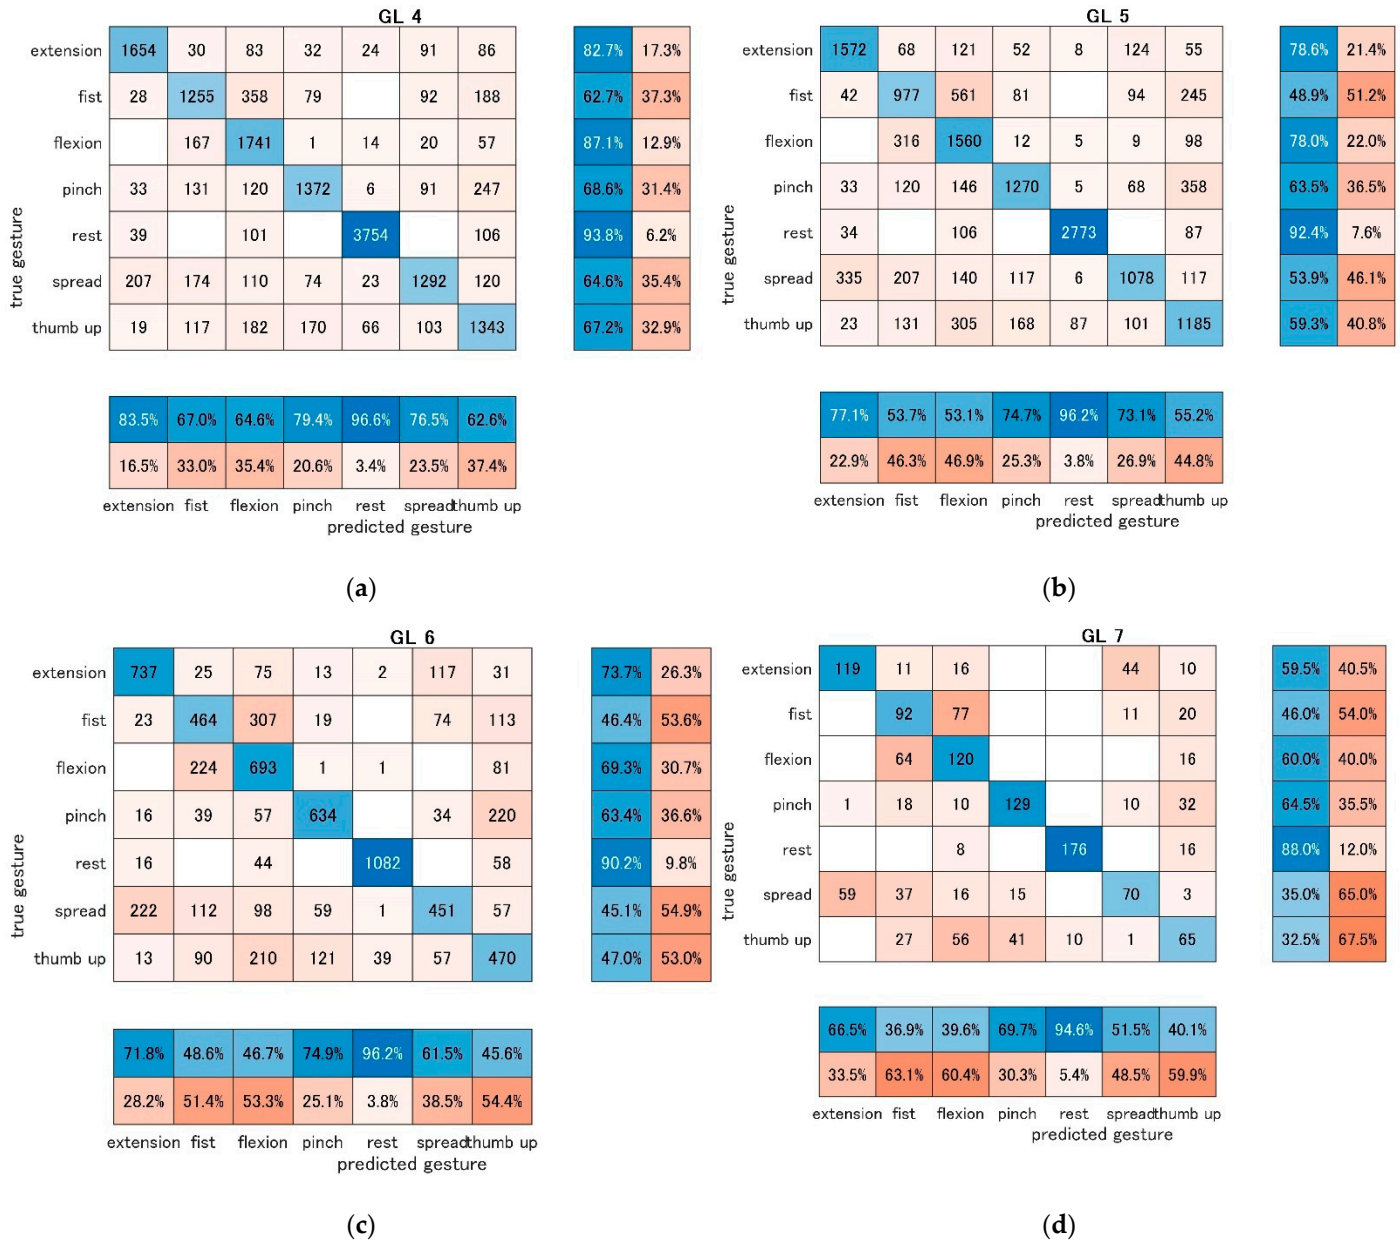

**Figure S7.** This is parietic cross-validation confusion matrix charts with predicted on x-axis and true gesture labels on y-axis which return accuracy rate value using k-NN on the affected side: (a) all possible combinations (20) withing 4 gesture labels (GL4) with the total mean accuracy rate of 88.56%; (b) all possible combinations (15) withing 5 gesture labels (GL5) with the total mean accuracy rate of 88.08%; (c) all possible combinations (6) withing 6 gesture labels (GL6) with the total mean accuracy rate of 87.10%; (d) one possible combination withing 7 gesture labels (GL7) with the total mean accuracy rate of 87.30%. PCA has not been applied for ASF-24P feature set.

Confusion matrix charts of possible random gesture combinations in NP19 using SVM with the dimensional reduction using PCA.

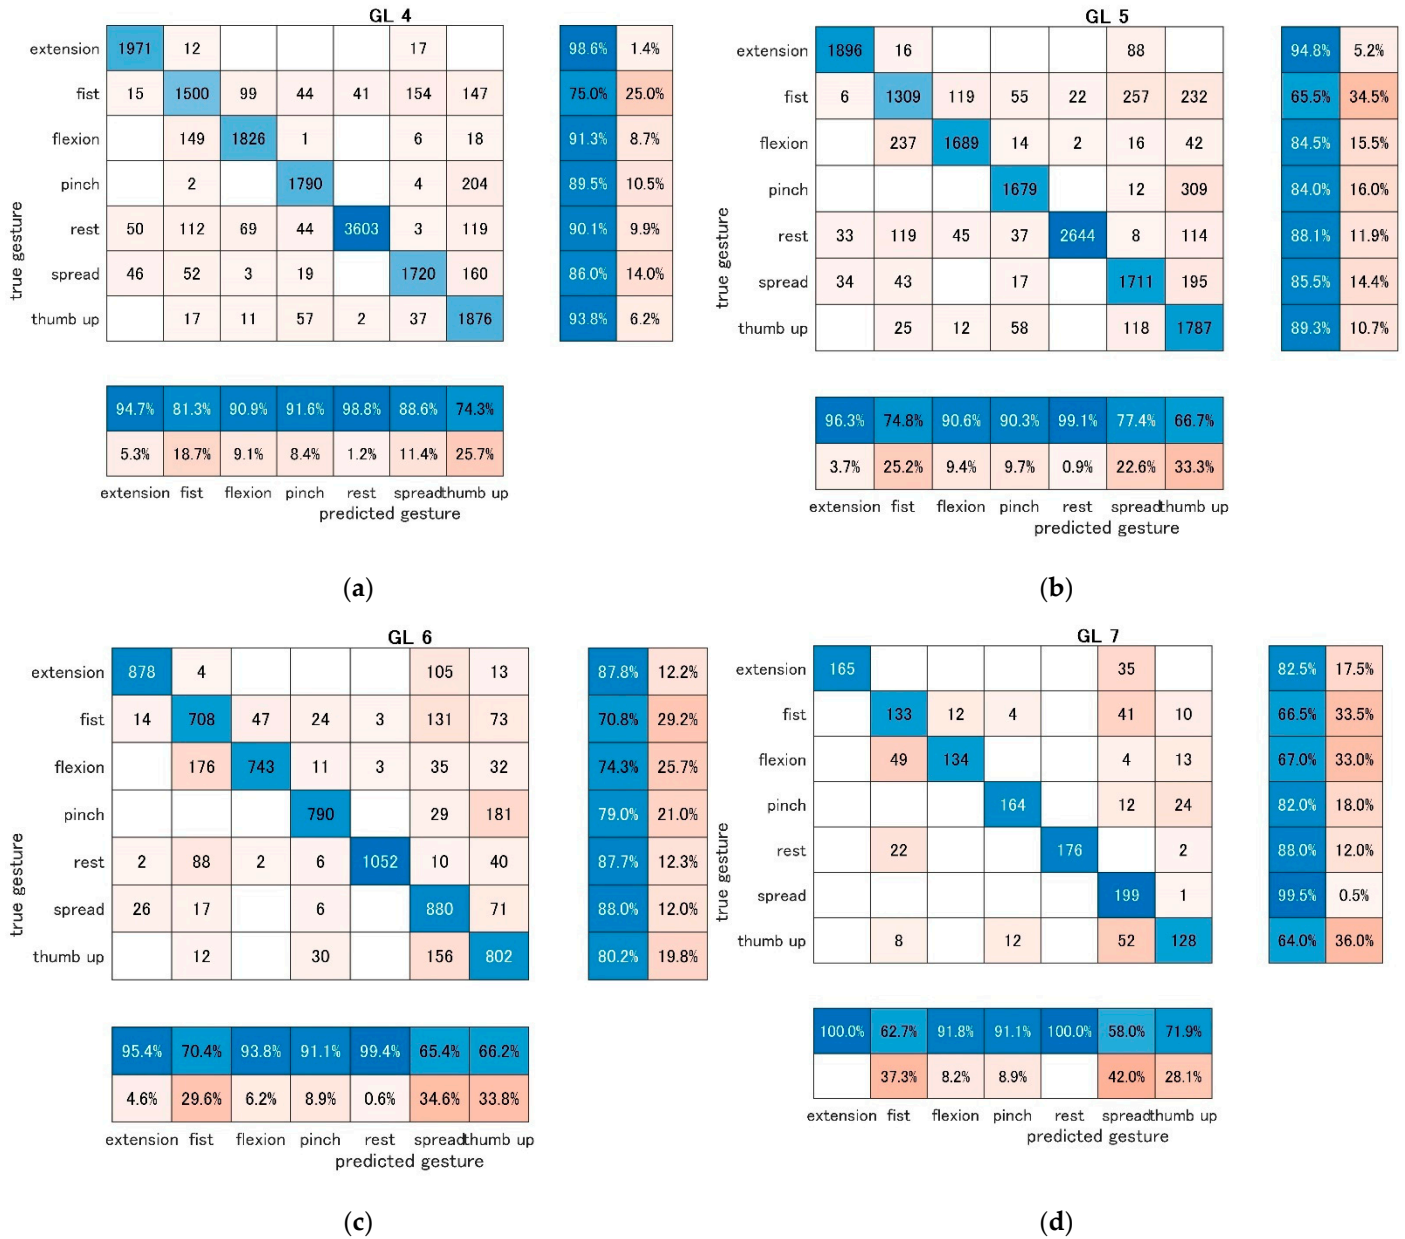

**Figure S8.** This is non-paretic cross-validation confusion matrix charts with predicted on x-axis and true gesture labels on y-axis which return accuracy rate value using SVM on the non-affected side: (a) all possible combinations (20) withing 4 gesture labels (GL4) with the total mean accuracy rate of 94.81%; (b) all possible combinations (15) withing 5 gesture labels (GL5) with the total mean accuracy rate of 94.00%; (c) all possible combinations (6) withing 6 gesture labels (GL6) with the total mean accuracy rate of 93.82%; (d) one possible combination withing 7 gesture labels (GL7) with the total mean accuracy rate of 93.53%. PCA set to 23 at the ASF-14NP feature set.



Confusion matrix charts of possible random gesture combinations in NP19 using LDA with the dimensional reduction using PCA.

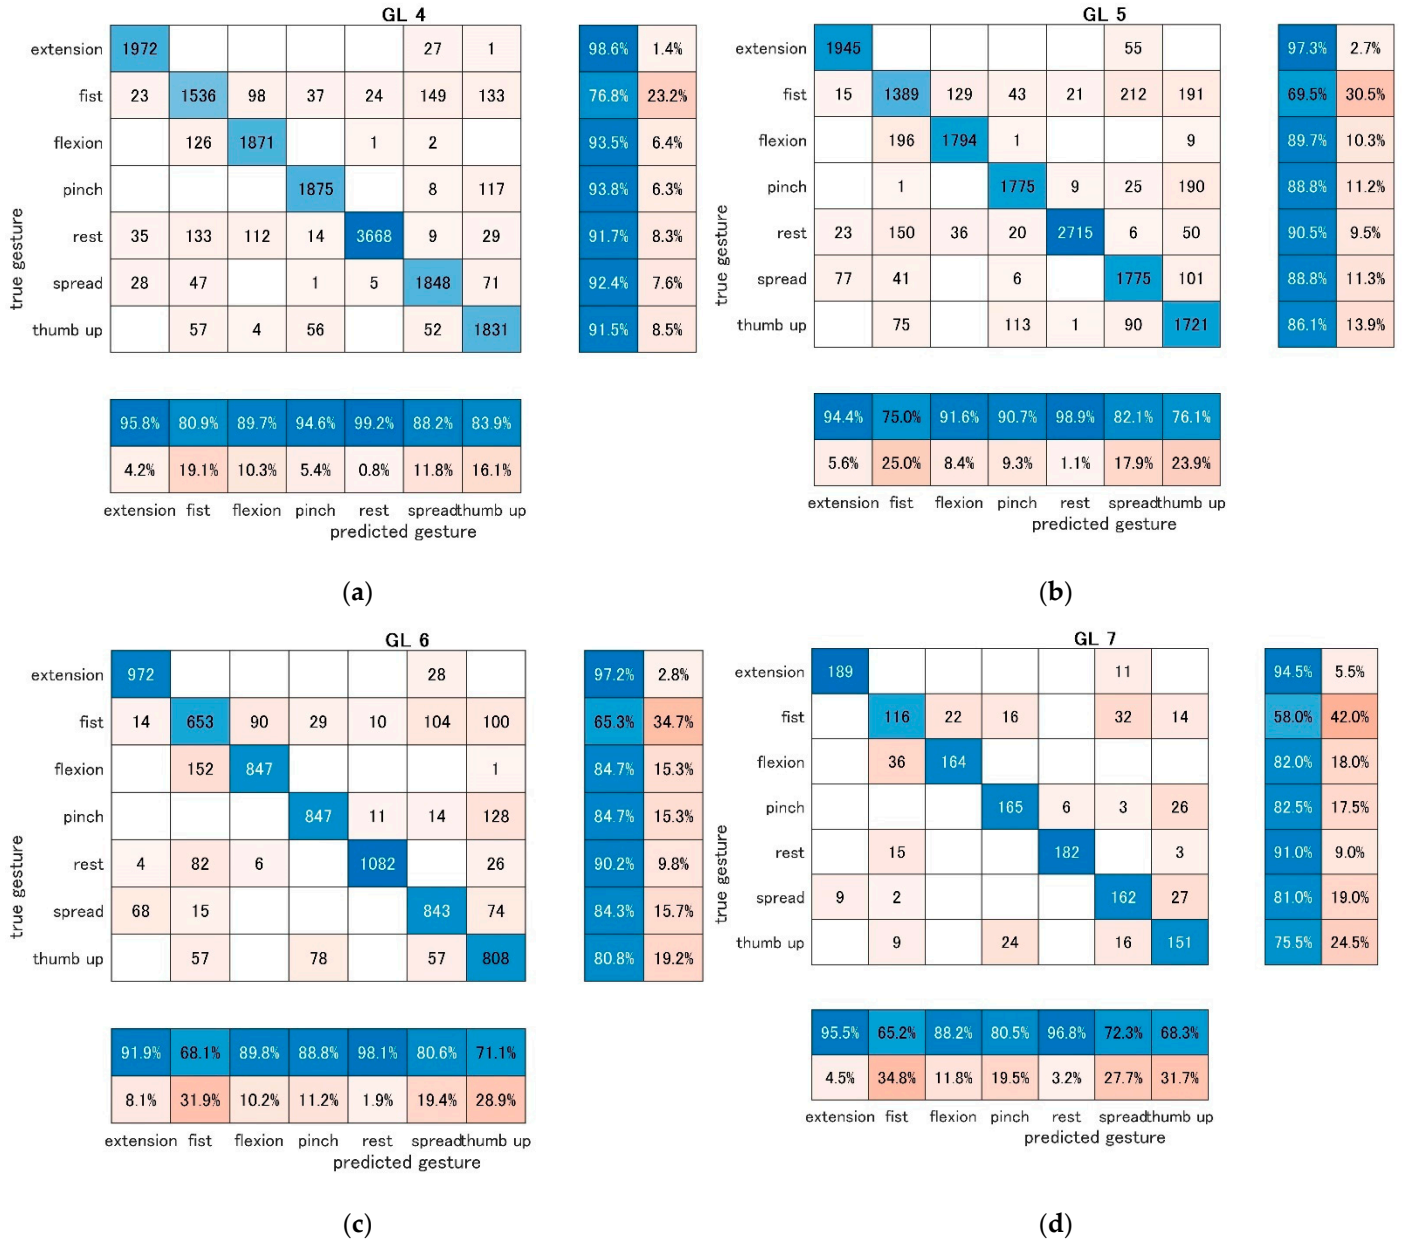

**Figure S9.** This is non-paretic cross-validation confusion matrix charts with predicted on x-axis and true gesture labels on y-axis which return accuracy rate value using LDA on the non-affected side: (a) all possible combinations (20) withing 4 gesture labels (GL4) with the total mean accuracy rate of 95.42%; (b) all possible combinations (15) withing 5 gesture labels (GL5) with the total mean accuracy rate of 95.30%; (c) all possible combinations (6) withing 6 gesture labels (GL6) with the total mean accuracy rate of 94.81%; (d) one possible combination withing 7 gesture labels (GL7) with the total mean accuracy rate of 94.36%. PCA set to 19 at the ASF-14NP feature set.

Confusion matrix charts of possible random gesture combinations in NP19 using k-NN with the dimensional reduction using PCA.

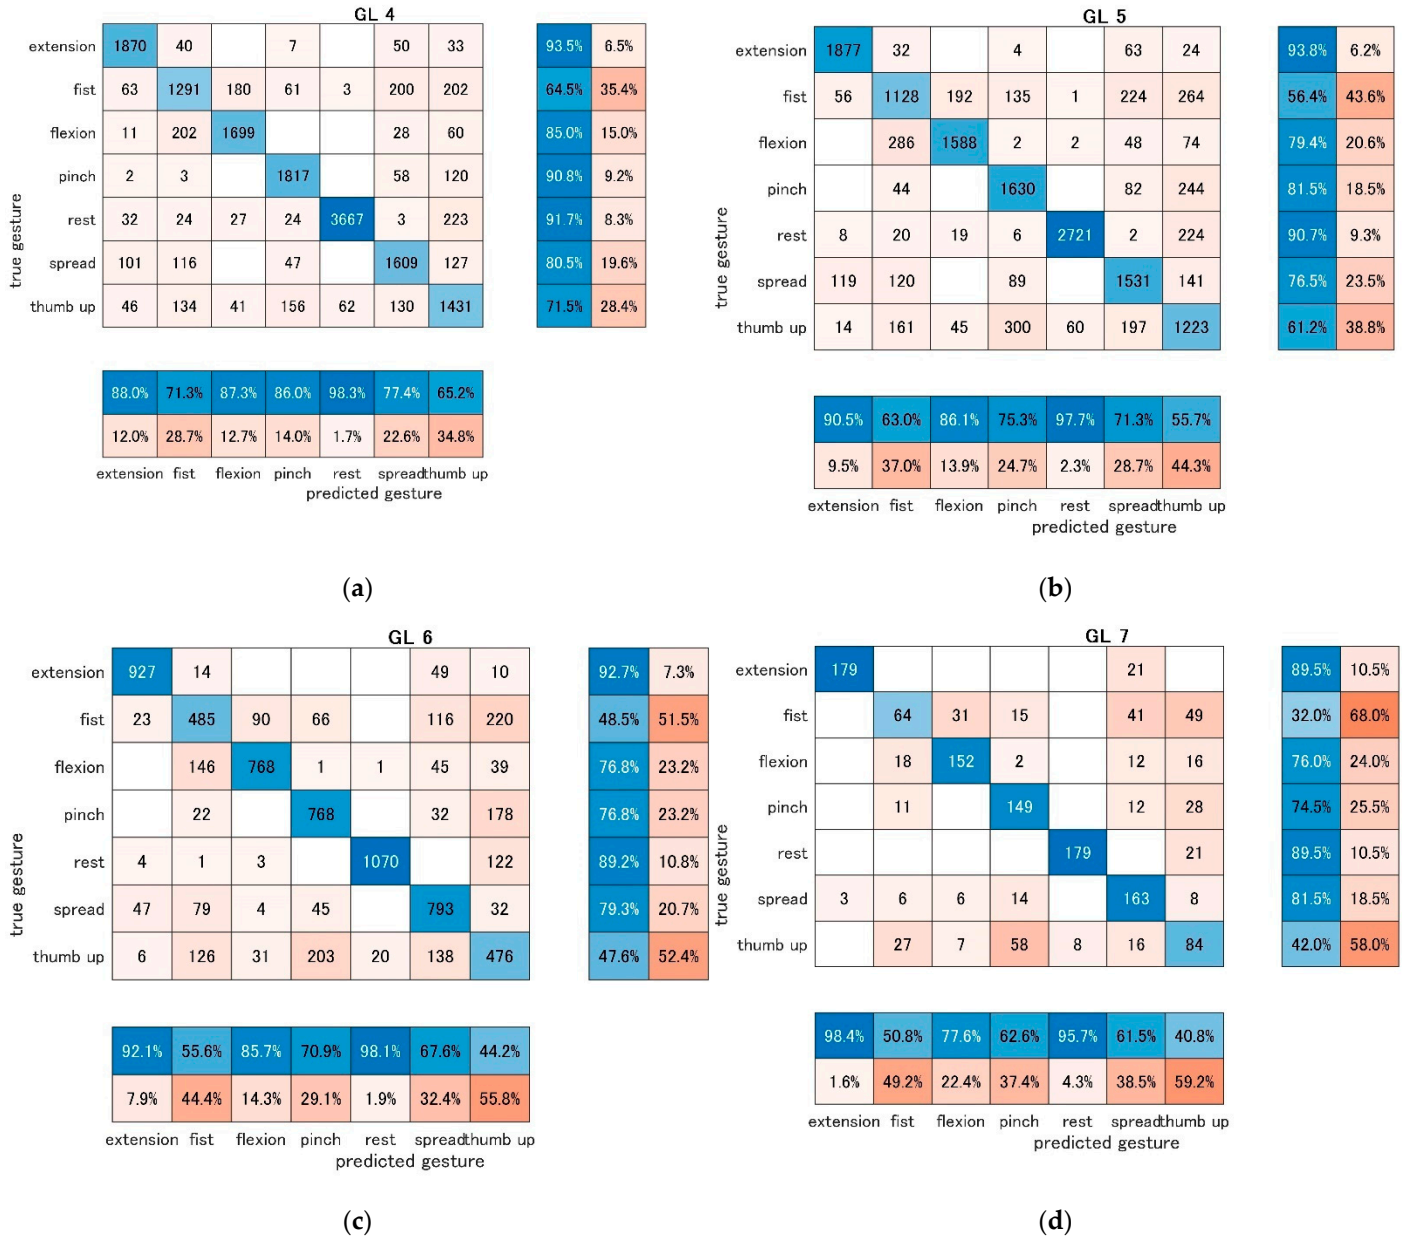

**Figure S10.** This is non-paretic cross-validation confusion matrix charts with predicted on x-axis and true gesture labels on y-axis which return accuracy rate value using k-NN on the non-affected side: **(a)** all possible combinations (20) withing 4 gesture labels (GL4) with the total mean accuracy rate of 92.15%; **(b)** all possible combinations (15) withing 5 gesture labels (GL5) with the total mean accuracy rate of 91.63%; **(c)** all possible combinations (6) withing 6 gesture labels (GL6) with the total mean accuracy rate of 91.63%; **(d)** one possible combination withing 7 gesture labels (GL7) with the total mean accuracy rate of 90.83%. PCA set to 8 at the ASF-14NP feature set.

Confusion matrix charts of possible random gesture combinations in P19 using SVM with the dimensional reduction using PCA.

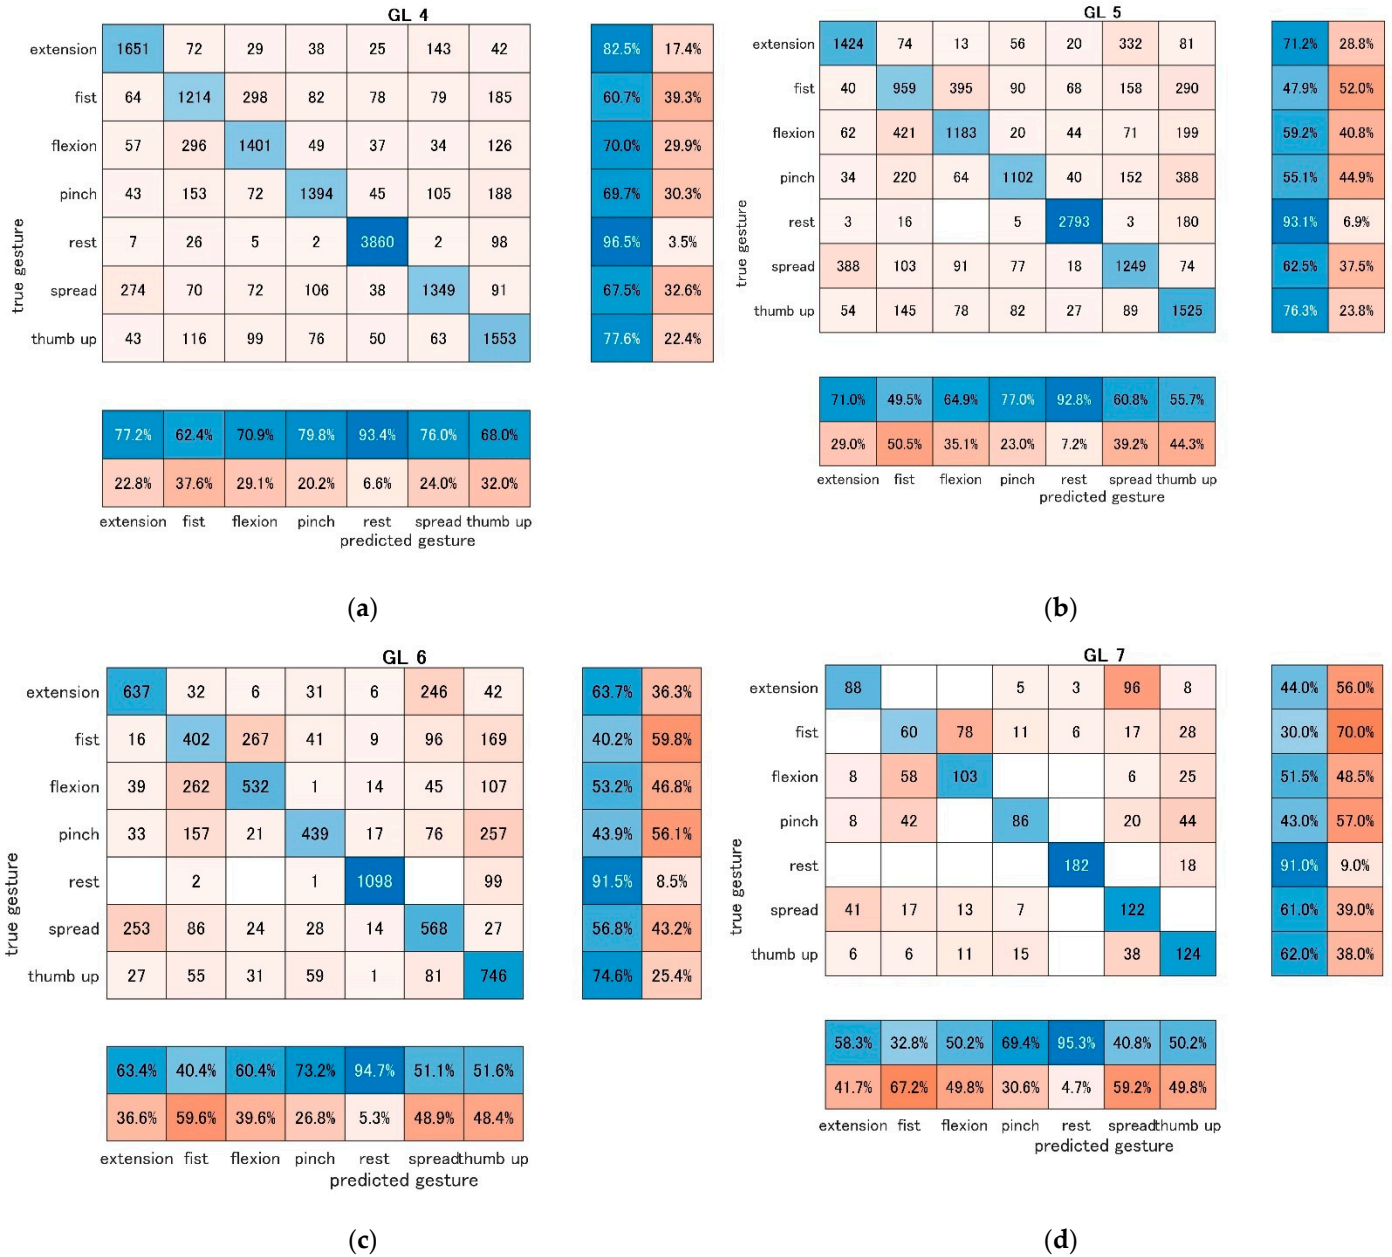

**Figure S11.** This is parietic cross-validation confusion matrix charts with predicted on x-axis and true gesture labels on y-axis which return accuracy rate value using SVM on the affected side: (a) all possible combinations (20) withing 4 gesture labels (GL4) with the total mean accuracy rate of 88.67%; (b) all possible combinations (15) withing 5 gesture labels (GL5) with the total mean accuracy rate of 87.45%; (c) all possible combinations (6) withing 6 gesture labels (GL6) with the total mean accuracy rate of 87.13%; (d) one possible combination withing 7 gesture labels (GL7) with the total mean accuracy rate of 87.30%. PCA set to 35 at the ASF-24P feature set.

Confusion matrix charts of possible random gesture combinations in P19 using LDA with the dimensional reduction using PCA.

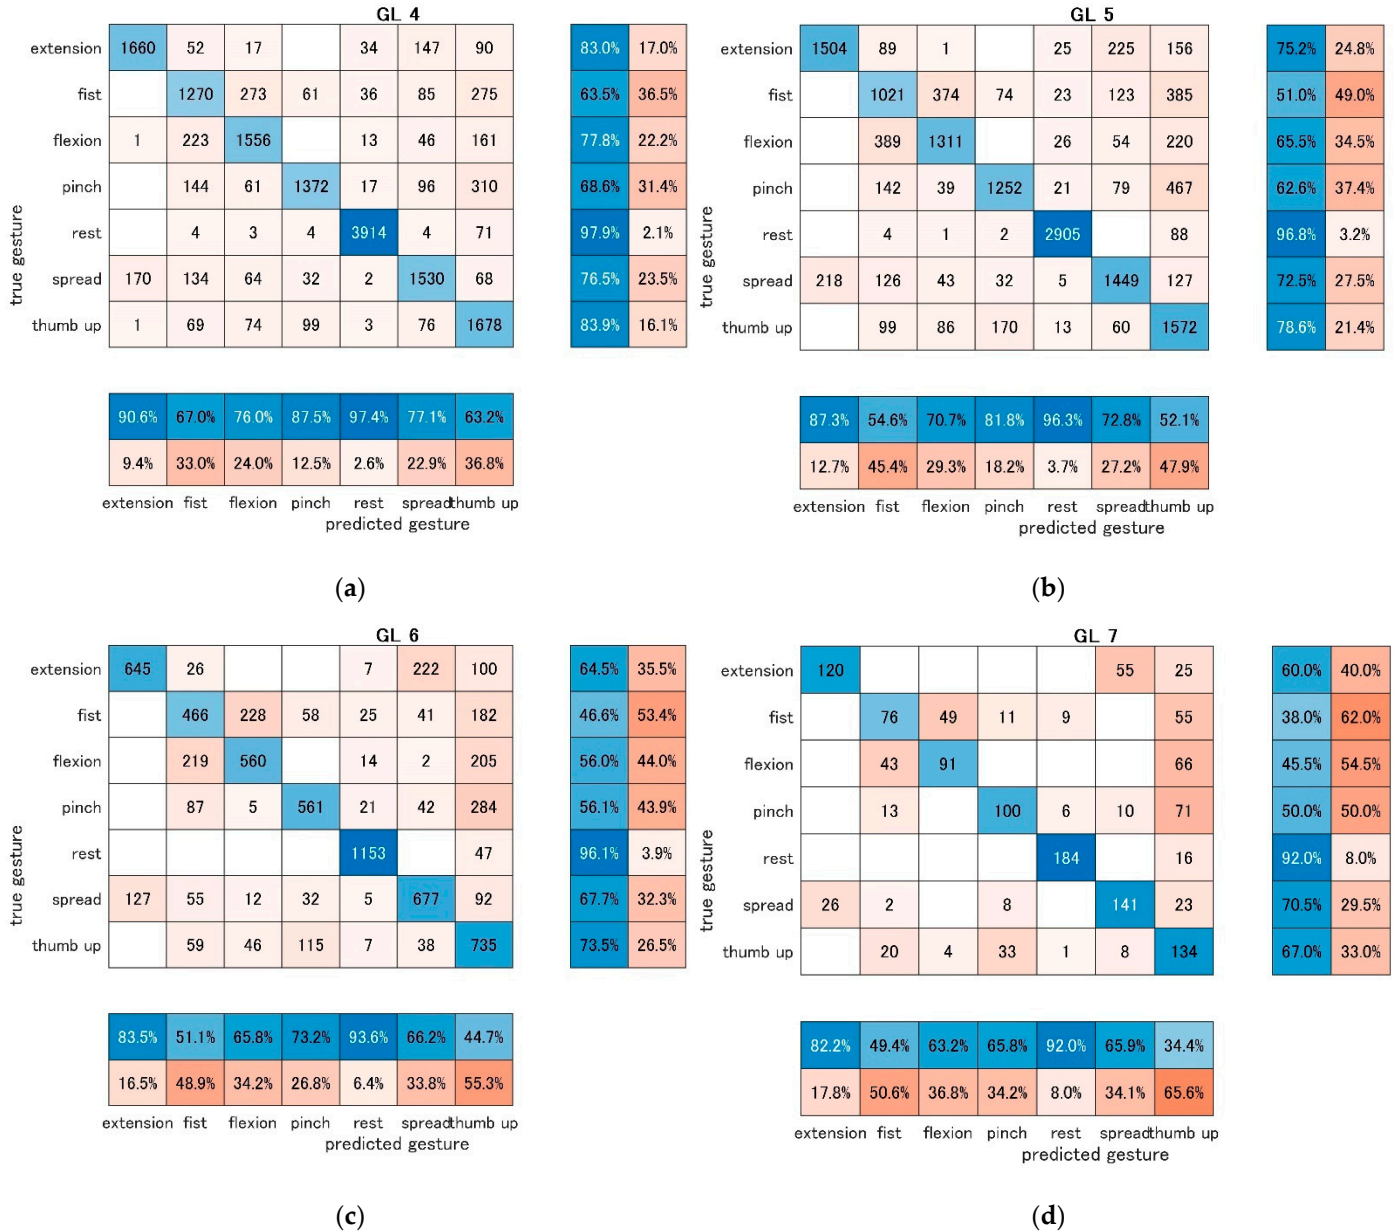

**Figure S12.** This is parietic cross-validation confusion matrix charts with predicted on x-axis and true gesture labels on y-axis which return accuracy rate value using LDA on the affected side: (a) all possible combinations (20) withing 4 gesture labels (GL4) with the total mean accuracy rate of 90.20%; (b) all possible combinations (15) withing 5 gesture labels (GL5) with the total mean accuracy rate of 89.57%; (c) all possible combinations (6) withing 6 gesture labels (GL6) with the total mean accuracy rate of 89.32%; (d) one possible combination withing 7 gesture labels (GL7) with the total mean accuracy rate of 89.27%. PCA set to 5 at the ASF-24P feature set.



Confusion matrix charts of possible random gesture combinations in P19 using k-NN with the dimensional reduction using PCA.

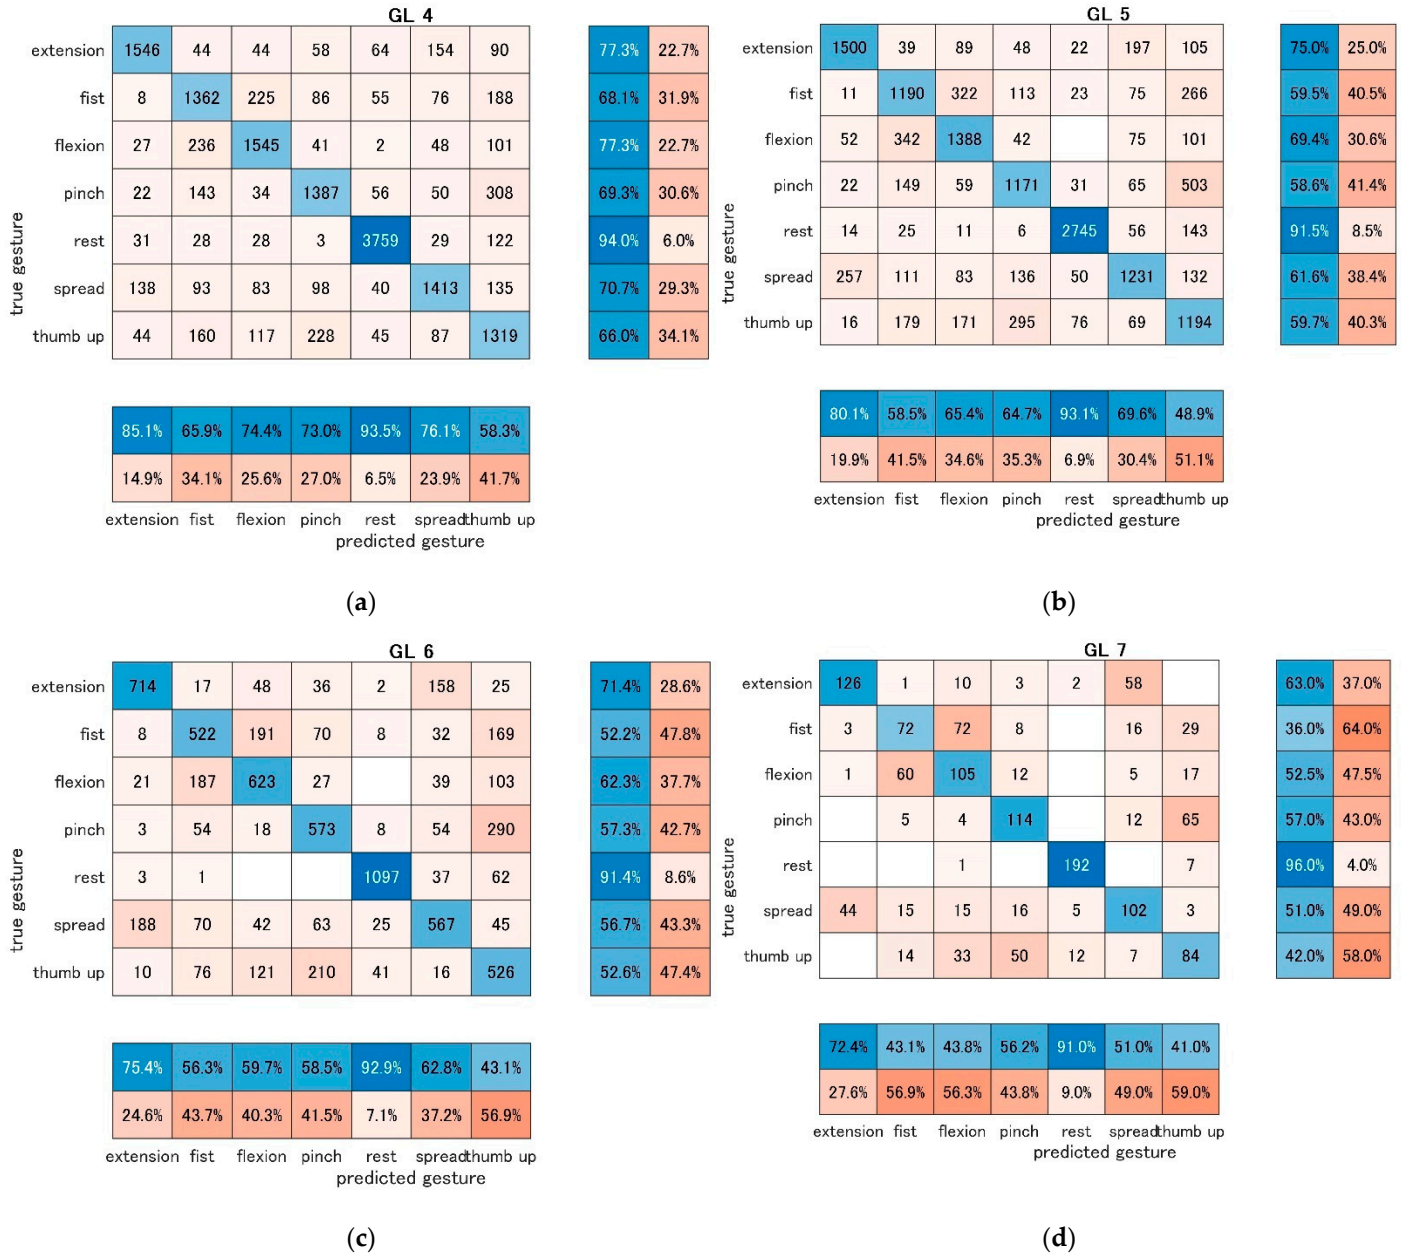

**Figure S13.** This is paretic cross-validation confusion matrix charts with predicted on x-axis and true gesture labels on y-axis which return accuracy rate value using k-NN on the affected side: (a) all possible combinations (20) withing 4 gesture labels (GL4) with the total mean accuracy rate of 88.55%; (b) all possible combinations (15) withing 5 gesture labels (GL5) with the total mean accuracy rate of 87.98%; (c) all possible combinations (6) withing 6 gesture labels (GL6) with the total mean accuracy rate of 87.35%; (d) one possible combination withing 7 gesture labels (GL7) with the total mean accuracy rate of 88.88%. PCA set to 5 at the ASF-24P feature set.

**Table S1.** Statistical verification of max of mean accuracy obtained by SVM, LDA, and k-NN with and without the use of PCA.

| Number of Gesture Labels | No PCA | PCA Dim. 5 | PCA Dim. 8 | PCA Dim. 19 | PCA Dim. 23 | PCA Dim 35 |
|--------------------------|--------|------------|------------|-------------|-------------|------------|
| GL4 (P)                  | SVM *  | LDA*       | LDA*       | LDA*        | LDA*        | LDA        |
| GL4 (NP)                 | SVM*   | LDA*       | LDA*       | LDA*        | LDA*        | LDA*       |
| GL5 (P)                  | SVM*   | LDA*       | LDA*       | LDA*        | LDA*        | LDA*       |
| GL5 (NP)                 | SVM*   | LDA*       | LDA*       | LDA*        | LDA*        | LDA*       |
| GL6 (P)                  | SVM*   | LDA*       | LDA*       | LDA*        | LDA*        | LDA*       |
| GL6 (NP)                 | SVM*   | LDA*       | LDA*       | LDA*        | LDA*        | LDA*       |
| GL7 (P)                  | SVM    | LDA        | LDA        | LDA         | LDA         | LDA        |
| GL7 (NP)                 | SVM    | LDA*       | LDA*       | LDA         | LDA         | LDA        |

\* Asterisk indicates statistical significance based on the paired *t*-test ( $p < 0.05$ ).

**Table S2.** Statistical verification of max  $F_1$ -score performance metrics obtained by SVM, LDA, and k-NN with and without the use of PCA.

| Number of Gesture Labels | No PCA | PCA Dim. 5 | PCA Dim. 8 | PCA Dim. 19 | PCA Dim. 23 | PCA Dim 35 |
|--------------------------|--------|------------|------------|-------------|-------------|------------|
| GL4 (P)                  | SVM *  | LDA*       | LDA*       | LDA*        | LDA*        | LDA        |
| GL4 (NP)                 | SVM*   | LDA*       | LDA*       | LDA*        | LDA*        | LDA*       |
| GL5 (P)                  | SVM*   | LDA*       | LDA*       | LDA*        | LDA*        | LDA*       |
| GL5 (NP)                 | SVM*   | LDA*       | LDA*       | LDA*        | LDA*        | LDA*       |
| GL6 (P)                  | SVM*   | LDA*       | LDA*       | LDA*        | LDA*        | LDA*       |
| GL6 (NP)                 | SVM*   | LDA*       | LDA*       | LDA*        | LDA*        | LDA*       |
| GL7 (P)                  | SVM    | LDA*       | LDA        | LDA         | LDA         | LDA        |
| GL7 (NP)                 | SVM    | LDA*       | LDA*       | LDA         | LDA         | LDA        |

\* Asterisk indicates statistical significance based on the paired *t*-test ( $p < 0.05$ ).
